# Supplementary material for: Evaluation of experiential teaching approaches to enhance pharmacy students’confidence and knowledge in pharmacogenomics
Source: Research Square preprint supplement (doi:10.21203/rs.3.rs-6806677/v1), 2025-06-17
Supplement: Supplementary file 2 [file a25576dc0f4e4535363e7b7d.pdf]

**Table 2.** Professional identity of the role of pharmacists and other HCPs in implementing pharmacogenomics.

| Survey Question                                                                                                                               | Pre vs post-module survey improvements in each Cohort (p-value) <sup>a</sup> |          |           | Pairwise comparisons of the proportions (%) of students that ‘strongly agree’ in post-module survey between the three Cohorts |          |           |                      | Post-module survey comparison of proportion (%) of students who “strongly agree” among those who did/did not undergo self-pharmacogenomic testing in Cohort C <sup>b</sup> |                |                     |
|-----------------------------------------------------------------------------------------------------------------------------------------------|------------------------------------------------------------------------------|----------|-----------|-------------------------------------------------------------------------------------------------------------------------------|----------|-----------|----------------------|----------------------------------------------------------------------------------------------------------------------------------------------------------------------------|----------------|---------------------|
|                                                                                                                                               | A (n=60)                                                                     | B (n=21) | C (n=114) | A (n=252)                                                                                                                     | B (n=49) | C (n=209) | p-value <sup>b</sup> | Test (n=86)                                                                                                                                                                | No Test (n=22) | p-value             |
| I believe that pharmacists can use pharmacogenomic testing to optimise medication efficacy and/or prevent adverse events                      | <0.0001                                                                      | 0.0078   | 0.0006    | 73                                                                                                                            | 71       | 70        | ns*                  | 80                                                                                                                                                                         | 68             | 0.2550              |
| I believe that physicians/general practitioners can use pharmacogenomic testing to optimise medication efficacy and/or prevent adverse events | <0.0001                                                                      | 0.0312   | <0.0001   | 69                                                                                                                            | 80       | 73        | ns                   | 80                                                                                                                                                                         | 73             | 0.4429              |
| I believe that pharmacogenomic testing is critical for optimal patient care                                                                   | <0.0001                                                                      | 0.0742   | <0.0001   | 63                                                                                                                            | 55       | 62        | ns                   | 65                                                                                                                                                                         | 55             | 0.3596              |
| I believe that pharmacogenomic testing is best utilised when pharmacists and medical doctors work together to optimise medications            | 0.0054                                                                       | 0.1250   | 0.0266    | 73                                                                                                                            | 77       | 75        | ns                   | 83                                                                                                                                                                         | 68             | 0.1352              |
| Pharmacogenomics will play an important role in my future career as a pharmacist                                                              | 0.0012                                                                       | 0.0010   | <0.0001   | 39                                                                                                                            | 35       | 39        | ns                   | 48                                                                                                                                                                         | 36             | 0.3416              |
| All pharmacists understand the clinical application of pharmacogenomics                                                                       | 0.0904                                                                       | 0.001    | <0.0001   | 18                                                                                                                            | 24       | 27        | A vs C, p=0.0172     | 27                                                                                                                                                                         | 18             | 0.5824 <sup>c</sup> |
| I understand the role of pharmacists in applying pharmacogenomic information to patient care                                                  | <0.0001                                                                      | 0.0002   | <0.0001   | 36                                                                                                                            | 27       | 44        | B vs C, p=0.0289     | 48                                                                                                                                                                         | 32             | 0.1817              |
| I may encounter pharmacogenomics-related questions during my practice as a pharmacist                                                         | 0.0004                                                                       | 0.0605   | <0.0001   | 45                                                                                                                            | 33       | 39        | ns                   | 49                                                                                                                                                                         | 23             | 0.0317 <sup>c</sup> |
| Pharmacogenomic should be taught in all pharmacy schools                                                                                      | 0.0004                                                                       | 0.0361   | 0.0008    | 52                                                                                                                            | 39       | 52        | ns                   | 65                                                                                                                                                                         | 27             | 0.0016              |

<sup>a</sup>p-value of Wilcoxon matched-pairs signed rank test

<sup>b</sup>p-value of Chi-Squared test unless otherwise stated

<sup>c</sup>p-value of Fisher’s exact test

ns indicates that none of the three pairwise comparisons are significant
