# Supplementary material for: Evaluation of experiential teaching approaches to enhance pharmacy students’confidence and knowledge in pharmacogenomics
Source: Research Square preprint supplement (doi:10.21203/rs.3.rs-6806677/v1), 2025-06-17
Supplement: Supplementary file 3 [file afb85f6d9d58dc7cac413737.pdf]

**Table 3.** Perceptions towards self-pharmacogenomic testing

| Survey Question                                                                                                                | Pre vs post-module survey improvements in each Cohort (p-value) <sup>a</sup> |          |           | Pairwise comparisons of the proportions (%) of students that ‘strongly agree’ in post-module survey between the three Cohorts |          |           |                                              | Post-module survey comparison of proportion (%) of students who “strongly agree” among those who did/did not undergo self-pharmacogenomic testing in Cohort C <sup>b</sup> |                |                      |
|--------------------------------------------------------------------------------------------------------------------------------|------------------------------------------------------------------------------|----------|-----------|-------------------------------------------------------------------------------------------------------------------------------|----------|-----------|----------------------------------------------|----------------------------------------------------------------------------------------------------------------------------------------------------------------------------|----------------|----------------------|
|                                                                                                                                | A (n=60)                                                                     | B (n=21) | C (n=114) | A (n=252)                                                                                                                     | B (n=49) | C (n=209) | p-value <sup>b</sup>                         | Test (n=86)                                                                                                                                                                | No Test (n=22) | p-value              |
| I am interested in having my own pharmacogenomic testing done                                                                  | <0.0001                                                                      | 0.0938   | 0.0003    | 51                                                                                                                            | 66       | 51        | ns                                           | 72                                                                                                                                                                         | 14             | <0.0001 <sup>c</sup> |
| I think that having my own pharmacogenomic testing would help me to understand the clinical utility of pharmacogenomic testing | <0.0001                                                                      | 0.0938   | 0.0004    | 51                                                                                                                            | 57       | 48        | ns                                           | 71                                                                                                                                                                         | 14             | <0.0001 <sup>c</sup> |
| Undergoing personal genotyping would help me to understand the patients' experience if they undergo personal genotyping        | 0.0012                                                                       | 0.0469   | 0.0175    | 47                                                                                                                            | 62       | 47        | ns                                           | 66                                                                                                                                                                         | 27             | 0.0009               |
| The information from a pharmacogenomic test may improve the way my medication treatment is currently managed                   | 0.0018                                                                       | 0.5156   | <0.0001   | 49                                                                                                                            | 55       | 46        | ns                                           | 64                                                                                                                                                                         | 23             | 0.0007 <sup>c</sup>  |
| The information from a pharmacogenomic test may improve the way my medication treatment will be managed in the future          | 0.0045                                                                       | 0.75     | <0.0001   | 53                                                                                                                            | 51       | 49        | ns                                           | 71                                                                                                                                                                         | 18             | <0.0001 <sup>c</sup> |
| I find it easy to decide whether or not to undergo personal pharmacogenomic testing                                            | NA                                                                           | 0.0742   | 0.0018    | 9                                                                                                                             | 45       | 41        | A v B,<br>p<0.0001<br><br>A v C,<br>p<0.0001 | 59                                                                                                                                                                         | 5              | <0.0001 <sup>c</sup> |
| I empathise with patients who may experience anxiety about personal genotyping                                                 | NA                                                                           | 0.0957   | <0.0001   | NA                                                                                                                            | 41       | 40        | ns                                           | 54                                                                                                                                                                         | 18             | 0.0035 <sup>c</sup>  |
| I find it easy to decide whether or not to undergo personal genotyping for disease risk                                        | NA                                                                           | 0.1719   | <0.0001   | NA                                                                                                                            | 43       | 38        | ns                                           | 54                                                                                                                                                                         | 10             | <0.0001 <sup>c</sup> |
| I empathise with patient's who may experience anxiety about personal genotyping for disease risk                               | NA                                                                           | 0.1211   | 0.0044    | 26                                                                                                                            | 43       | 42        | A v B,<br>p=0.013<br><br>A v C,<br>p=0.0002  | 52                                                                                                                                                                         | 27             | 0.0402               |

<sup>a</sup>p-value of Wilcoxon matched-pairs signed rank test<sup>b</sup>p-value of Chi-Squared test unless otherwise stated<sup>c</sup>p-value of Fisher's exact test

ns indicates that none of the three pairwise comparisons are significant
